# Supplementary material for: Crystal engineering of cadmium coordination polymers decorated with nitro-functionalized thiophene-2,5-dicarboxylate and structurally related bis(imidazole) ligands with varying flexibility
Source: Royal Society of Chemistry journal article supplement (doi:10.1039/c5ce01248a), 2015-01-01

## Electronic Supplementary Information

# Crystal engineering of cadmium coordination polymers decorated by nitro-functionalized thiophene-2,5-dicarboxylate and structurally related bis(imidazole) ligands with varying flexibility

**Table S1** Selected bond distances (Å) and angles (°) for complexes 1–5

| Compound 1 <sup>a</sup>                                                                                                        |            |                     |            |                     |            |
|--------------------------------------------------------------------------------------------------------------------------------|------------|---------------------|------------|---------------------|------------|
| Cd(1)–O(1)                                                                                                                     | 2.227(4)   | Cd(1)–O(3)#2        | 2.298(4)   | Cd(1)–O(7)          | 2.388(5)   |
| Cd(1)–O(4)#2                                                                                                                   | 2.604(4)   | Cd(1)–N(1)          | 2.260(5)   | Cd(1)–N(2)#1        | 2.298(5)   |
| O(1)–Cd(1)–N(1)                                                                                                                | 101.26(17) | O(1)–Cd(1)–N(2) #2  | 90.6(2)    | N(1)–Cd(1)–N(2)#1   | 106.65(18) |
| O(1)–Cd(1)–O(3)#2                                                                                                              | 111.41(16) | N(1)–Cd(1)–O(3)#2   | 144.76(15) | N(2)#1–Cd(1)–O(3)#2 | 86.37(16)  |
| O(1)–Cd(1)–O(7)                                                                                                                | 87.75(19)  | N(1)–Cd(1)–O(7)     | 87.15(17)  | N(2)#1–Cd(1)–O(7)   | 166.14(18) |
| O(3)#2–Cd(1)–O(7)                                                                                                              | 81.45(16)  | O(1)–Cd(1)–O(4)#2   | 164.17(16) | N(1)–Cd(1)–O(4)#2   | 93.68(14)  |
| N(2)–Cd(1)–O(4)#2                                                                                                              | 90.10(16)  | O(3)#2–Cd(1)–O(4)#2 | 52.87(13)  | O(7)–Cd(1)–O(4)#2   | 87.79(16)  |
| <sup>a</sup> Symmetry codes: #1x, -y+3/2, z-1/2; #2 x+1, y, z.                                                                 |            |                     |            |                     |            |
| Compound 2 <sup>b</sup>                                                                                                        |            |                     |            |                     |            |
| Cd(1)–O(1)                                                                                                                     | 2.378(7)   | Cd(1)–O(2)#4        | 2.476(7)   | Cd(1)–O(3)#3        | 2.481(9)   |
| Cd(1)–O(4)#3                                                                                                                   | 2.323(7)   | Cd(1)–N(1)          | 2.246(10)  | Cd(1)–N(4)#2        | 2.221(10)  |
| O(1)–Cd(1)–O(2)#4                                                                                                              | 164.4(3)   | O(1)–Cd(1)–O(3)#3   | 92.9(3)    | O(2)#4–Cd(1)–O(3)#3 | 80.4(3)    |
| O(4)#3–Cd(1)–O(3)#3                                                                                                            | 55.4(3)    | O(4)#3–Cd(1)–O(2)#4 | 80.3(3)    | O(4)#3–Cd(1)–O(1)   | 84.3(3)    |
| N(1)–Cd(1)–O(1)                                                                                                                | 92.2(3)    | N(4)#2–Cd(1)–O(1)   | 97.7(3)    | N(1)–Cd(1)–O(4)#3   | 143.0(3)   |
| N(4)#2–Cd(1)–O(4)#3                                                                                                            | 103.5(3)   | N(4)#2–Cd(1)–N(1)   | 113.5(3)   | N(4)#2–Cd(1)–O(2)#2 | 83.6(3)    |
| N(1)–Cd(1)–O(2)#4                                                                                                              | 101.6(3)   | N(4)#2–Cd(1)–O(3)#3 | 155.3(3)   | N(1)–Cd(1)–O(3)#3   | 88.1(3)    |
| <sup>b</sup> Symmetry codes: #1 x-1, -y+3/2, z-1/2; #2 -x+2, -y+2, -z+1; #3 x+1, -y+3/2, z+1/2; #4 x+1, y, z.                  |            |                     |            |                     |            |
| Compound 3 <sup>c</sup>                                                                                                        |            |                     |            |                     |            |
| Cd(1)–O(1)                                                                                                                     | 2.359(2)   | Cd(1)–O(2)#1        | 2.249(2)   | Cd(1)–O(3)#2        | 2.404(2)   |
| Cd(1)–O(4)#2                                                                                                                   | 2.353(2)   | Cd(1)–N(3)          | 2.332(3)   | Cd(1)–N(4)          | 2.269(3)   |
| O(2)#1–Cd(1)–N(4)                                                                                                              | 90.04(9)   | O(2)#1–Cd(1)–N(3)   | 82.63(9)   | N(4)–Cd(1)–N(3)     | 97.34(9)   |
| O(2)#1–Cd(1)–O(4)#2                                                                                                            | 96.30(8)   | N(4)–Cd(1)–O(4)#2   | 160.89(9)  | N(3)–Cd(1)–O(4)#2   | 101.33(9)  |
| O(2)#1–Cd(1)–O(1)                                                                                                              | 95.49(8)   | N(4)–Cd(1)–O(1)     | 79.59(8)   | N(3)–Cd(1)–O(1)     | 176.43(8)  |
| O(4)#2–Cd(1)–O(1)                                                                                                              | 81.87(8)   | O(2)#1–Cd(1)–O(3)#2 | 150.91(9)  | N(4)–Cd(1)–O(3)#2   | 118.83(9)  |
| N(3)–Cd(1)–O(3)#2                                                                                                              | 96.17(9)   | O(4)#2–Cd(1)–O(3)#2 | 55.25(8)   | O(1)–Cd(1)–O(3)#2   | 86.95(7)   |
| <sup>c</sup> Symmetry codes: #1 -x+3/2, -y+1/2, -z+1; #2 -x+1, -y+1, -z+1; #3 -x+3/2, y+1/2, -z+3/2; #4 -x+3/2, y-1/2, -z+3/2. |            |                     |            |                     |            |
| Compound 4 <sup>d</sup>                                                                                                        |            |                     |            |                     |            |
| Cd(1)–O(1)                                                                                                                     | 2.260(4)   | Cd(1)–O(2)          | 2.519(4)   | Cd(1)–N(1)          | 2.239(3)   |
| N(1)–Cd(1)–N(1)#1                                                                                                              | 96.84(18)  | N(1)–Cd(1)–O(1)     | 126.30(13) | N(1)–Cd(1)–O(1)#1   | 93.14(14)  |
| O(1)–Cd(1)–O(1)#1                                                                                                              | 121.7(2)   | N(1)–Cd(1)–O(2)     | 86.12(14)  | N(1)#1–Cd(1)–O(2)   | 136.73(15) |
| O(1)–Cd(1)–O(2)                                                                                                                | 53.35(13)  | O(1)#1–Cd(1)–O(2)   | 96.42(15)  | O(2)–Cd(1)–O(2)#1   | 120.3(2)   |
| <sup>d</sup> Symmetry codes: #1 x+1, -y+3/2, z+1/2.                                                                            |            |                     |            |                     |            |
| Compound 5 <sup>e</sup>                                                                                                        |            |                     |            |                     |            |
| Cd(1)–O(1)                                                                                                                     | 2.342(2)   | Cd(1)–O(2)          | 2.448(2)   | Cd(1)–O(3)          | 2.288(2)   |
| Cd(1)–O(4)                                                                                                                     | 2.591(3)   | Cd(1)–N(1)          | 2.238(2)   | Cd(1)#1–N(4)        | 2.241(2)   |

|                   |           |                   |           |                   |           |
|-------------------|-----------|-------------------|-----------|-------------------|-----------|
| N(1)–Cd(1)–N(4)#2 | 99.29(7)  | N(1)–Cd(1)–O(4)   | 135.62(8) | N(4)#2–Cd(1)–O(3) | 100.96(9) |
| N(1)–Cd(1)–O(1)   | 97.96(8)  | N(4)#2–Cd(1)–O(1) | 143.46(8) | O(3)–Cd(1)–O(1)   | 88.52(9)  |
| N(1)–Cd(1)–O(2)   | 134.27(8) | N(4)#2–Cd(1)–O(2) | 91.25(7)  | O(3)–Cd(1)–O(2)   | 84.25(8)  |
| O(1)–Cd(1)–O(2)   | 54.33(7)  | N(1)–Cd(1)–O(4)   | 84.05(8)  | N(4)#2–Cd(1)–O(4) | 108.85(9) |
| O(3)–Cd(1)–O(4)   | 52.08(8)  | O(1)–Cd(1)–O(4)   | 104.78(9) | O(2)–Cd(1)–O(4)   | 133.98(7) |

<sup>a</sup>Symmetry codes: #1 -x+2, y+1/2, -z+1/2; #2 -x+2, y-1/2, -z+1/2.

**Table S2** Hydrogen Bond Lengths (Å) and Bond Angles (°) in Complexes **1**, **2** and **5**.

| Compound <b>1</b> <sup>a</sup>   |        |          |           |        |
|----------------------------------|--------|----------|-----------|--------|
| D–H···A                          | d(D–H) | d(H···A) | d(D···A)  | <(DHA) |
| O(7)–H(1W)···O(2) <sup>i</sup>   | 0.85   | 2.11     | 2.919(7)  | 157.7  |
| O(7)–H(2W)···O(3) <sup>ii</sup>  | 0.85   | 1.93     | 2.740(6)  | 159.5  |
| O(8)–H(3W)···O(2) <sup>iii</sup> | 0.85   | 2.46     | 3.206(14) | 146.4  |
| O(8)–H(4W)···O(4) <sup>iv</sup>  | 0.85   | 2.48     | 3.311(15) | 167.7  |

<sup>a</sup>Symmetry codes: (i) -x+1, -y+2, -z+2; (ii) -x, -y+2, -z+2; (iii) -x+1, y-1/2, -z+3/2; (iv) x+1, y, z.

| Compound <b>2</b> <sup>b</sup> |        |          |           |        |
|--------------------------------|--------|----------|-----------|--------|
| D–H···A                        | d(D–H) | d(H···A) | d(D···A)  | <(DHA) |
| O(7)–H(1W)···O(4) <sup>i</sup> | 0.85   | 2.17     | 3.015(12) | 179.2  |
| O(7)–H(2W)···S(1)              | 0.85   | 2.95     | 3.353(9)  | 111.3  |
| O(7)–H(2W)···O(3)              | 0.85   | 2.15     | 2.998(13) | 179.4  |

<sup>b</sup>Symmetry codes: (i) x, -y+3/2, z-1/2.

| Compound <b>5</b> <sup>c</sup> |        |          |          |        |
|--------------------------------|--------|----------|----------|--------|
| D–H···A                        | d(D–H) | d(H···A) | d(D···A) | <(DHA) |
| O(9)–H(1W)···O(4)              | 0.85   | 2.12     | 2.923(4) | 156.3  |
| O(9)–H(2W)···O(6) <sup>i</sup> | 0.85   | 2.38     | 3.233(4) | 179.4  |

<sup>c</sup> Symmetry codes: (i) x+1, -y+1/2, z+1/2.

**Fig. S1** Coordination environment of Cd<sup>2+</sup> ion in **1**. All water and hydrogen atoms are omitted for clarity. Symmetry transformation used to generate equivalent atoms: (A) 1 + x, y, z; (B) x, 1.5 – y, –0.5 + z.

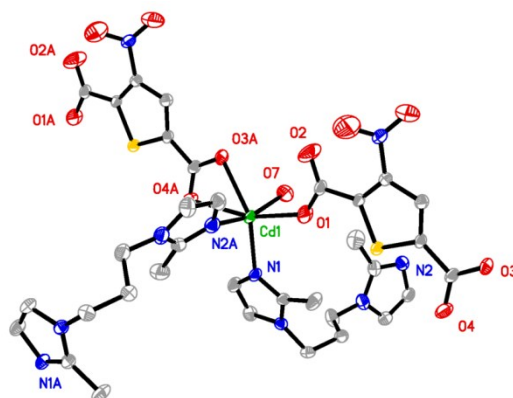

**Fig. S2** Coordination environment of  $\text{Cd}^{2+}$  ion in **2**. All water and hydrogen atoms are omitted for clarity. Symmetry transformation used to generate equivalent atoms: (A)  $1 + x, 1.5 - y, 0.5 + z$ ; (B)  $1 + x, y, z$ ; (C)  $2 - x, 2 - y, 1 - z$ .

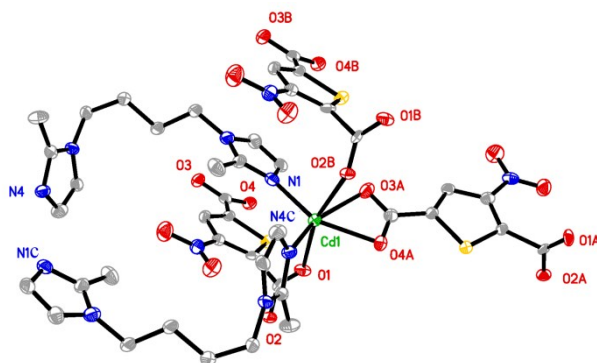

**Fig. S3** Coordination environment of  $\text{Cd}^{2+}$  ion in **3**. All water and hydrogen atoms are omitted for clarity. Symmetry transformation used to generate equivalent atoms (A)  $1.5 - x, 0.5 - y, 1.5 - z$ ; (B)  $1.5 - x, 0.5 + y, 1.5 - z$ .

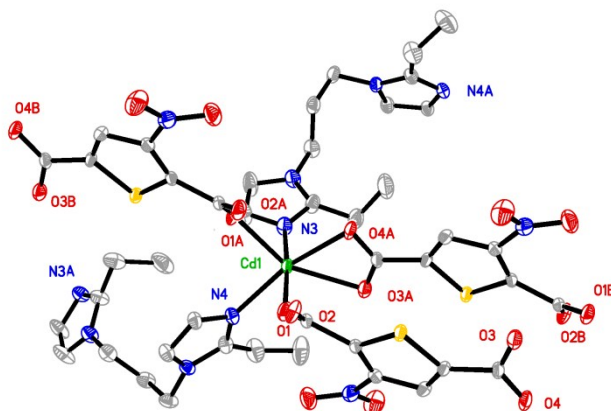

**Fig. S4** Coordination environment of  $\text{Cd}^{2+}$  ion in **4**. All water and hydrogen atoms are omitted for clarity. Symmetry transformation used to generate equivalent atoms (A)  $x, 1.5 - y, 0.5 - z$ ; (B)  $-0.5 - x, 1 - y, z$ ; (C)  $-0.5 - x, 0.5 + y, 0.5 - z$ ; (D)  $1 - x, 1 - y, 1 - z$ .

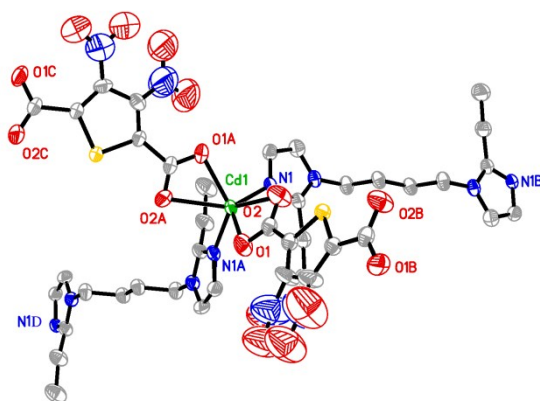

**Fig. S5** Coordination environment of Cd<sup>2+</sup> ion in **5**. All water and hydrogen atoms are omitted for clarity. Symmetry transformation used to generate equivalent atoms: (A)  $2 - x, -0.5 + y, 0.5 - z$ .

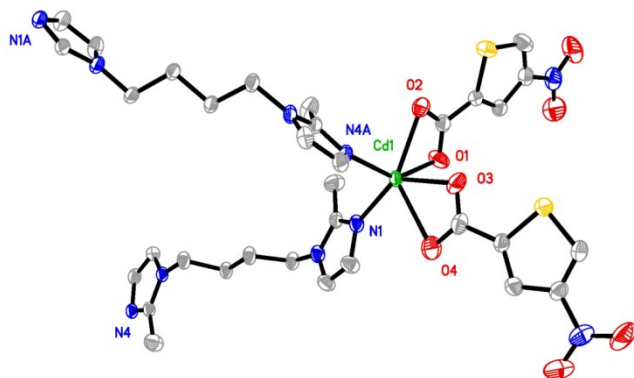

**Fig. S6** <sup>1</sup>H NMR spectrum of H<sub>2</sub>ntdc and Hntc ligands.

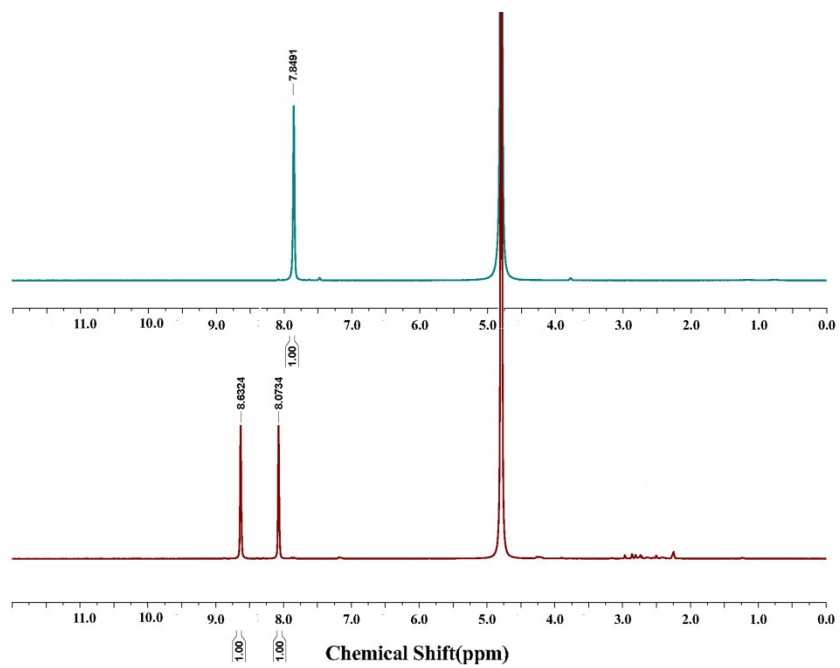

Fig. S7 PXRD patterns of as-synthesized and simulated 1-5.

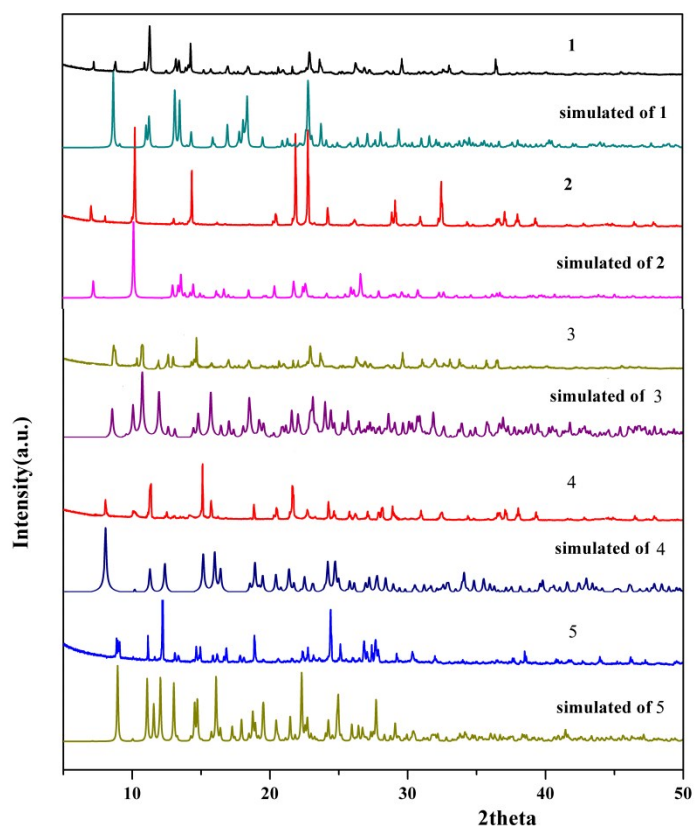

Fig. S8 TG curves of complexes 1-5.

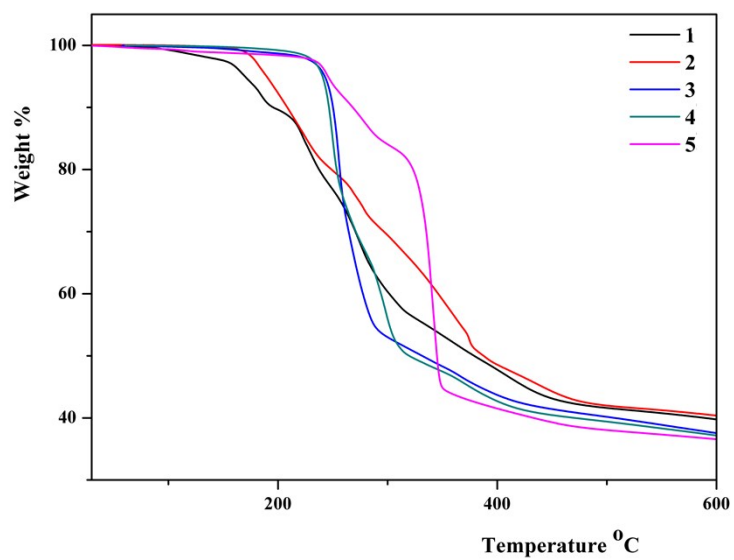

Fig. S9 Solid-state emission spectra of 1-4.

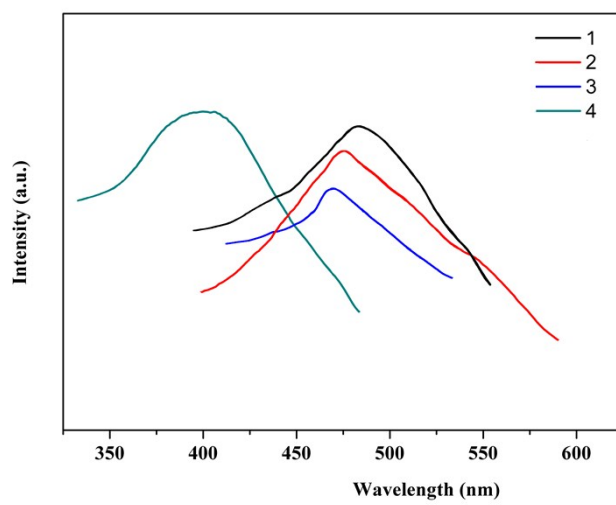

Supplement: c5ce01248a1.pdf [file c5ce01248a1.pdf]
